# Supplementary material
Source: PubMed Central journal article supplement (PMC5579351)
Supplement: EMBR-18-1660-s001.pdf [file EMBR-18-1660-s001.pdf]

## Expanded View Figures

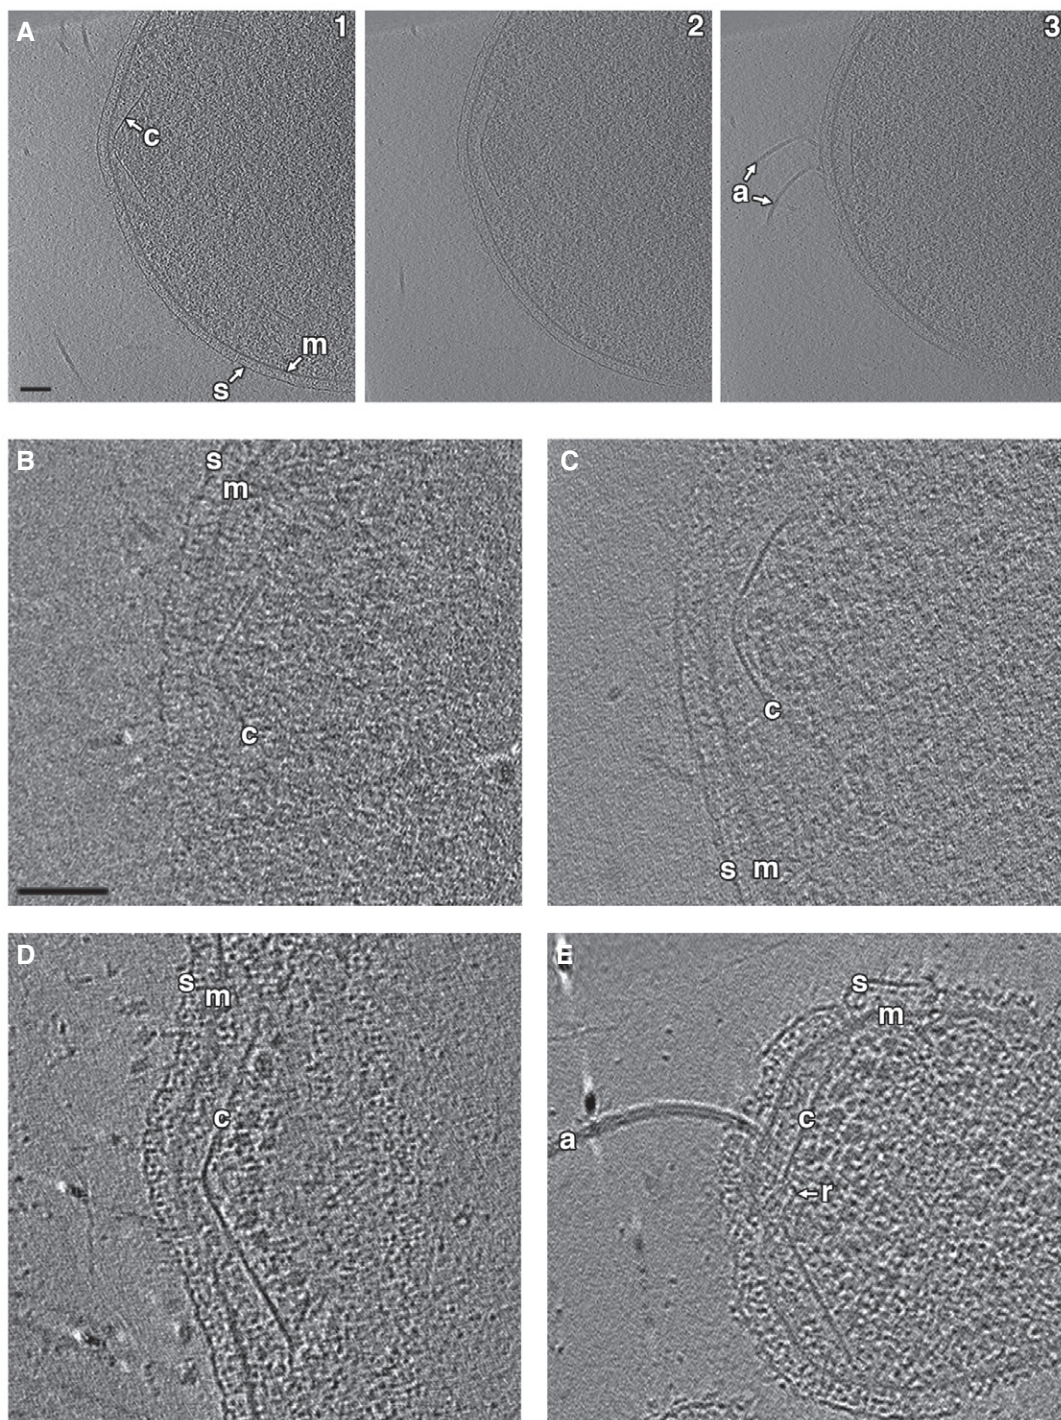

**Figure EV1. Additional examples of conical structures in *Thermococcus kodakaraensis* cells.**

A Sequential tomographic slices (1–3) at different heights through a side view of the cone.

B–E Additional examples of cones in intact (B and C) and lysed (D and E) cells are shown.

Data information: s, S-layer; m, membrane; c, conical structure; a, archaella; r, ring. Scale bars, 100 nm; scale bar in (A) applies to (1–3); scale bar in (B) applies to (B–E).

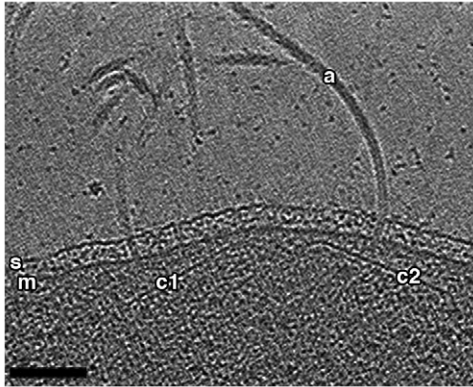

**Figure EV2. Double-cone structure observed in *Thermococcus kodakaraensis*.**

A tomographic slice through a side view shows two associated conical structures (c1 and c2), both associated with archaella (a). s, S-layer; m, membrane. Scale bar, 100 nm.



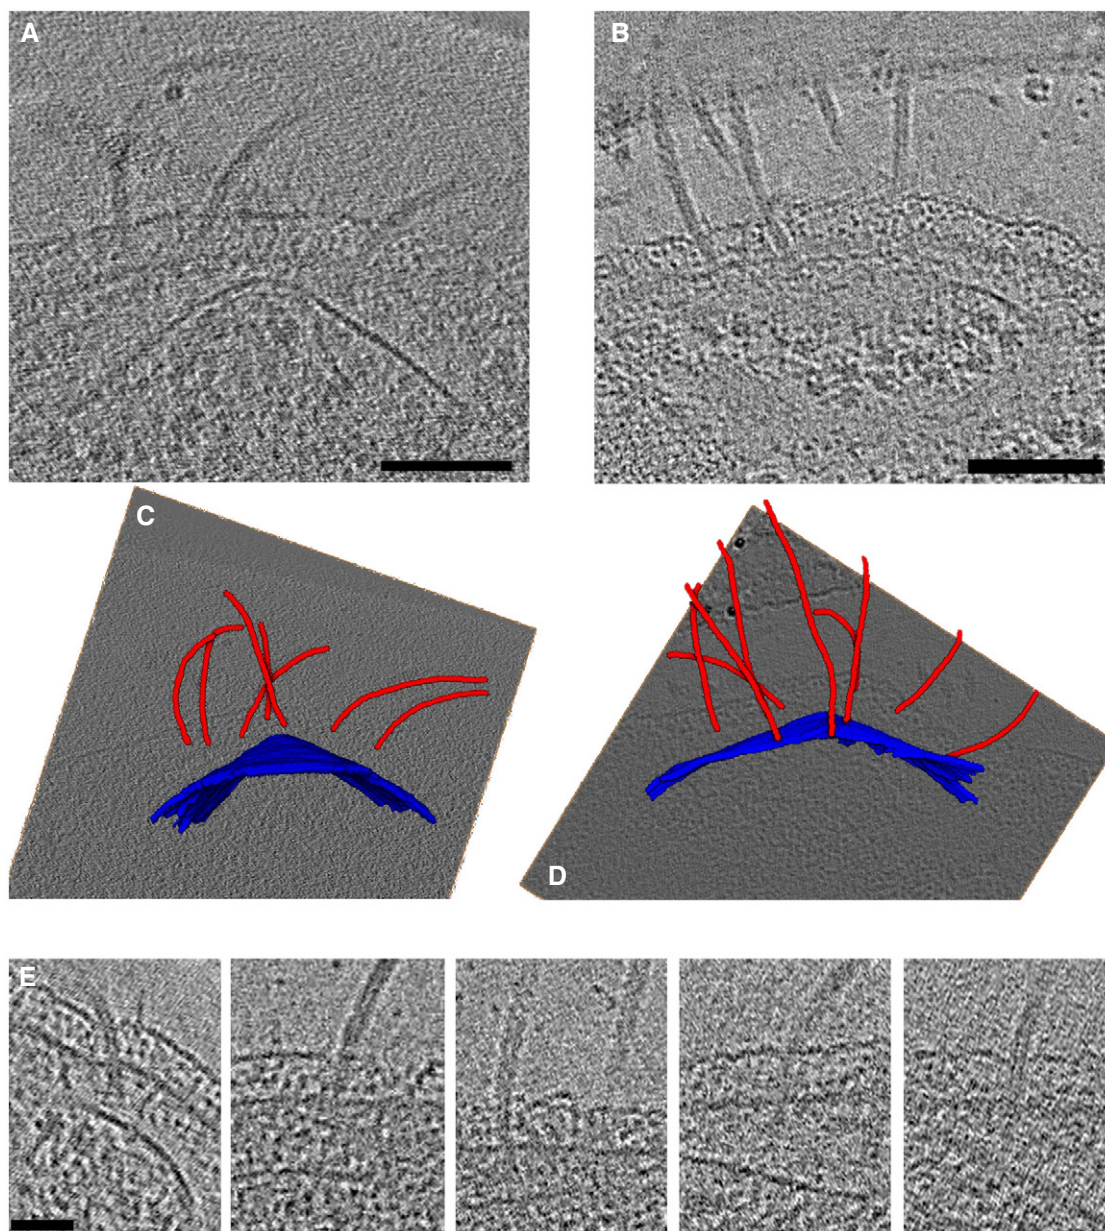

**Figure EV3. Association of cones with the archaellar bundle.**

A, B Tomographic slices through two cells, highlighting the association between the cone and the archaella.

C, D 3D segmentations of the cells in (A) and (B), respectively, with cones in blue and archaella in red, embedded in tomographic slices.

E Tomographic slices of individual archaella show the varying orientations of archaella with respect to the cell envelope, as well as apparent connections to the cone.

Data information: Scale bars, 100 nm in (A) and (B), 50 nm in (E) (applies to all panels in E); segmentations not to scale.

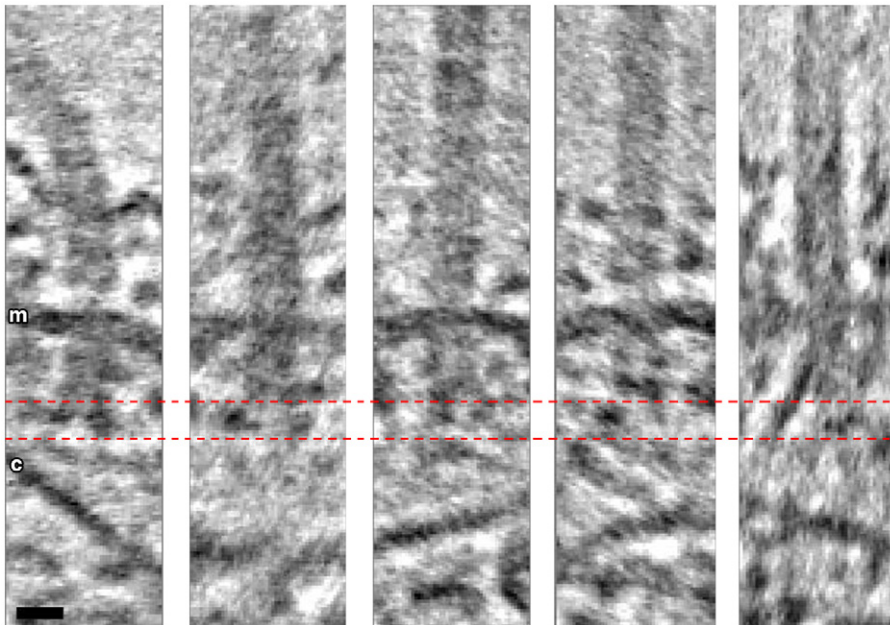

**Figure EV4. Individual particles from the subtomogram average show heterogeneity in the L3 density and angle of cone density.**

The L3 density appears as either two dots of similar (first two panels) or different intensity (third panel), a single dot (fourth panel), or a dot and an extended line (fifth panel). m, membrane; c, conical structure. Scale bar, 10 nm (applies to all panels).
